# Supplementary material for: Adaptive differentiation and rapid evolution of a soil bacterium along a climate gradient
Source: PubMed Central journal article supplement — Proc Natl Acad Sci U S A. 2021 Apr 27;118(18):e2101254118. doi: 10.1073/pnas.2101254118 (PMC8106337; doi:10.1073/pnas.2101254118), 2021-04-27
Supplement: pnas.2101254118.sapp.pdf [file pnas.2101254118.sapp.pdf]

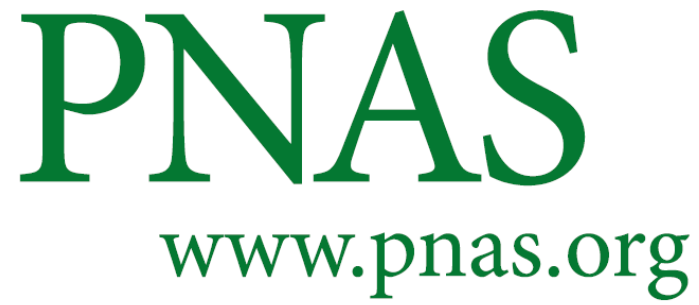

**Supplementary Information for**

Adaptive differentiation and rapid evolution of a soil bacterium along a climate gradient

Alexander B. Chase, Claudia Weihe, and Jennifer B. H. Martiny

AB Chase  
Email: [abchase@uci.edu](mailto:abchase@uci.edu)

**This PDF file includes:**

Figures S1 to S9  
SI References

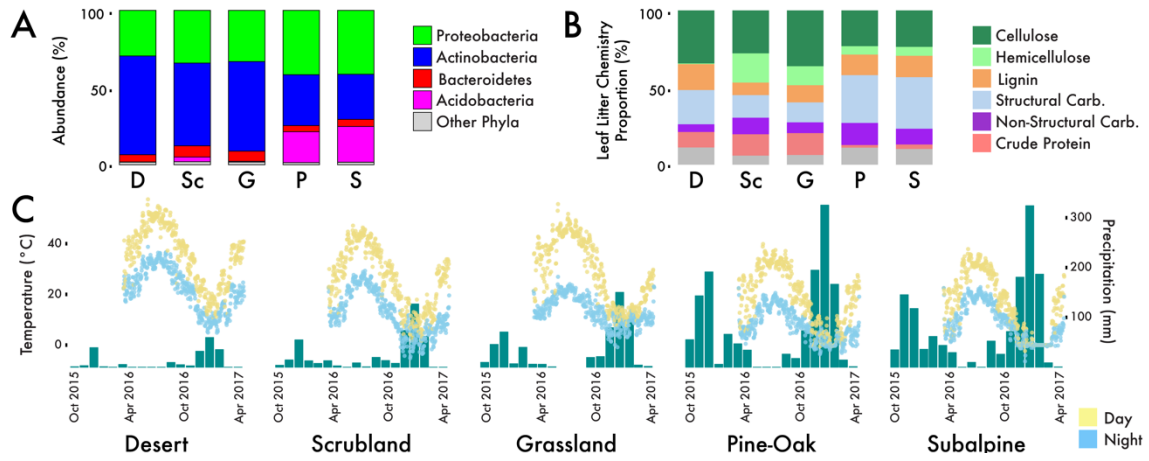

**Fig. S1.** Biotic and abiotic characteristics of the five sites along the elevation gradient. **A)** Relative abundance of four most abundant phyla in the survey leaf litter bacterial communities; taxa averaged across replicate plots. **B)** Mean leaf litter chemistry of non-ash dry weight from the dry season and wet season in 2015 (data from (1)). **C)** Surface soil temperature colored by day- or night-time measurement and total precipitation during the duration of the field experiment.

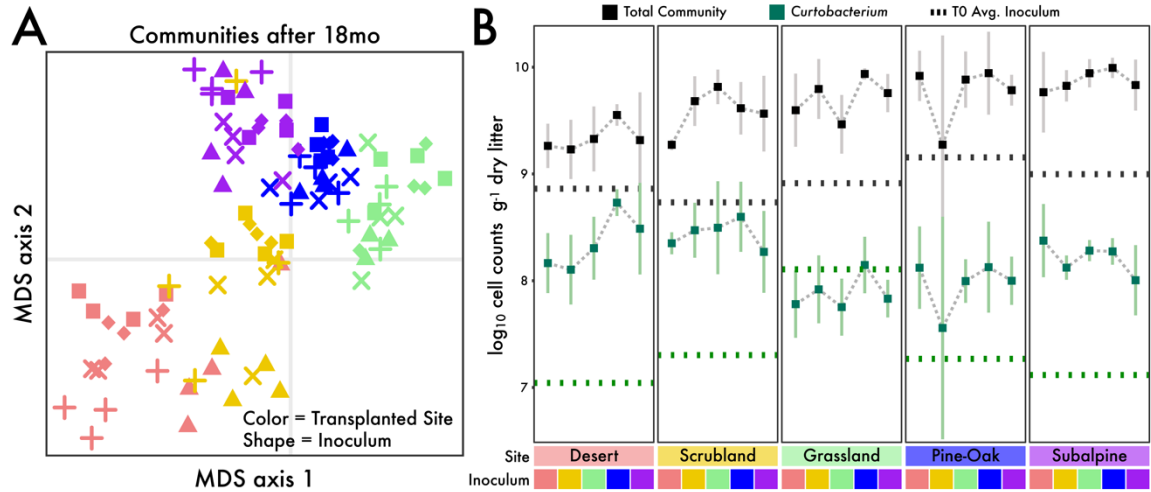

**Fig. S2.** Demographic shifts from the transplant experiment. **A)** Bacterial community composition after 18 months of transplant. Multidimensional scaling (MDS) plot depicting the difference in microbial communities. Symbols represent a metagenomic sample colored by site with shapes reflecting the initial litter inoculum. **B)** Absolute abundance of *Curtobacterium* and the total bacterial community. Dashed lines show abundances of initial inoculum at time point 0 at each site. Points show abundances of community and *Curtobacterium* after 18 months transplanted to each site. Error bars reflect standard deviations across 4 replicate plots.

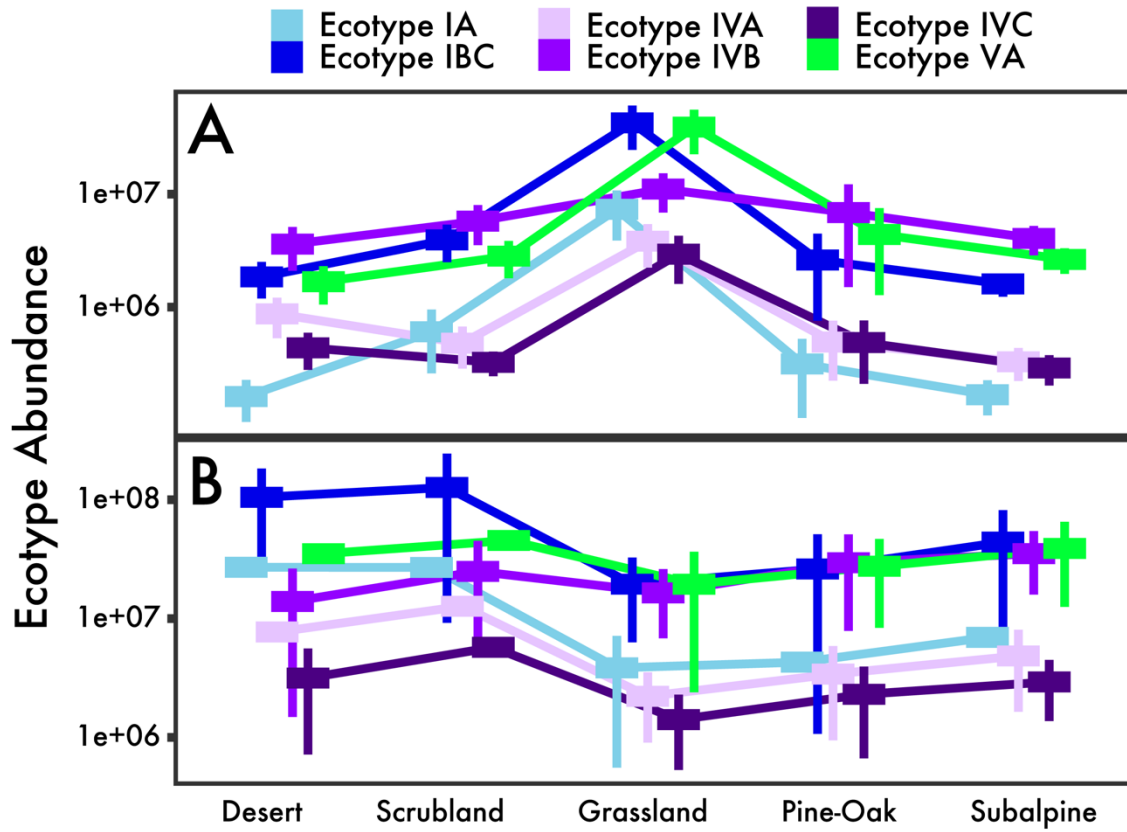

**Fig. S3.** Absolute abundances (by cell counts) of the top six abundant *Curtobacterium* ecotypes ( $\pm 1$  SD) by site **A)** for the initial inoculum from survey samples and **B)** after an 18-month transplant experiment.

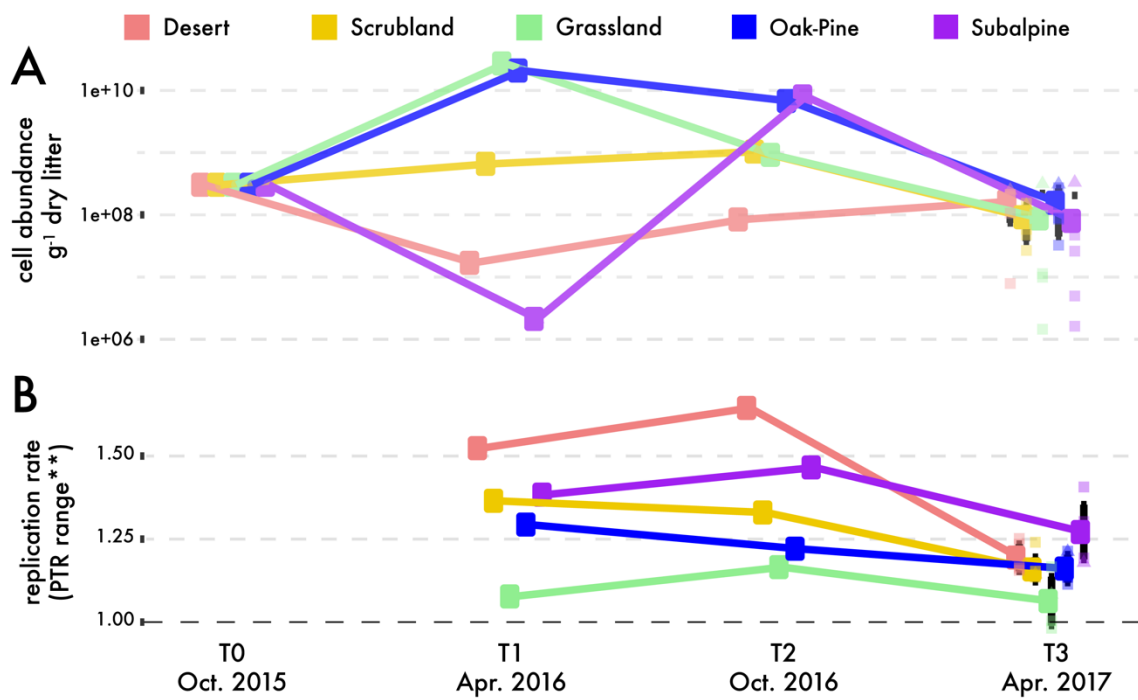

**Fig. S4.** Estimates of *Curtobacterium* strain MMLR14002 populations across sites and time points. **A)** Estimated number of cells based on normalization to flow cytometry cell counts. **B)** Relative replication rate estimates based on differential coverage of the ancestral genome from metagenomic reads. **\*\***No growth (PTR (peak to trough ratio) = 1.0) denoted in black.

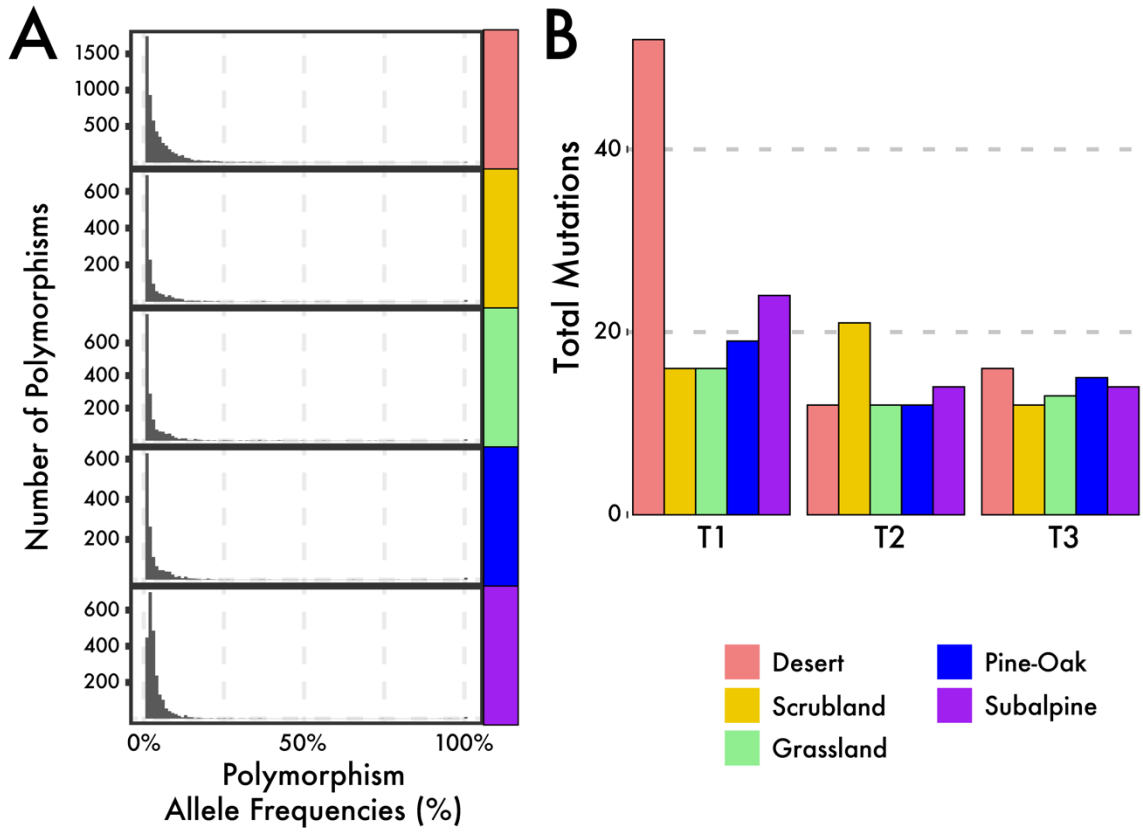

**Fig. S5.** Population genetic diversity of *Curtobacterium* IB/C strain MMLR14002. **A)** The number of polymorphisms observed across all sites by allele frequencies (%). **B)** Number of high-quality variants across sites and time points.

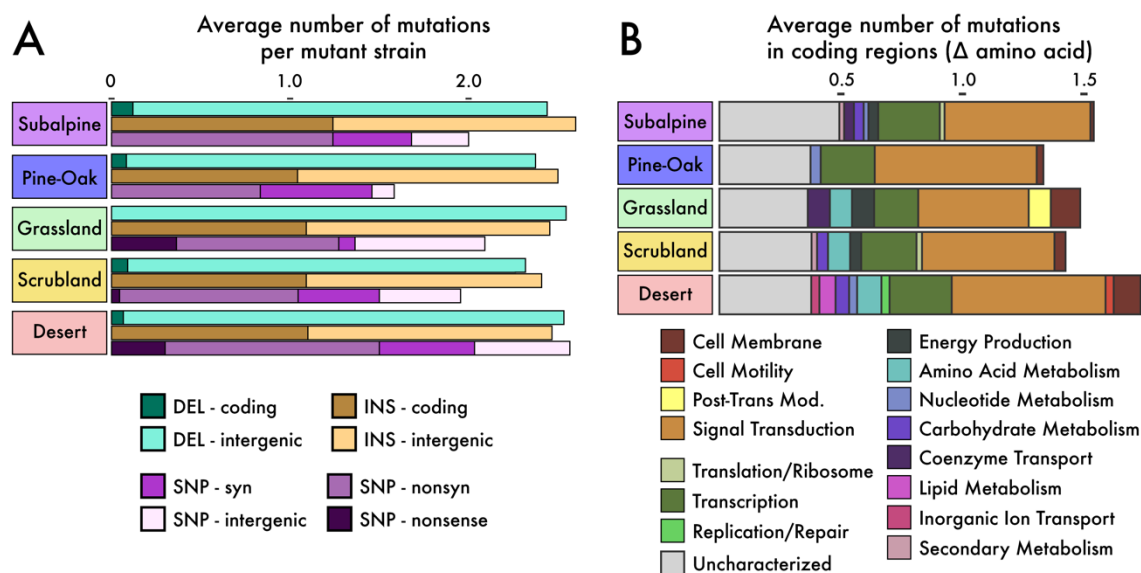

**Fig. S6.** Summary of mutations across sites. **A)** Average number of mutations in each mutant strain by mutation type (i.e., SNP or indel). Each mutation type is further broken down into sub-categories for coding or intergenic regions. **B)** Average number of mutations per mutant strain resulting in changes to an amino acid sequence of annotated genes. Genes were categorized and colored by functional groups.

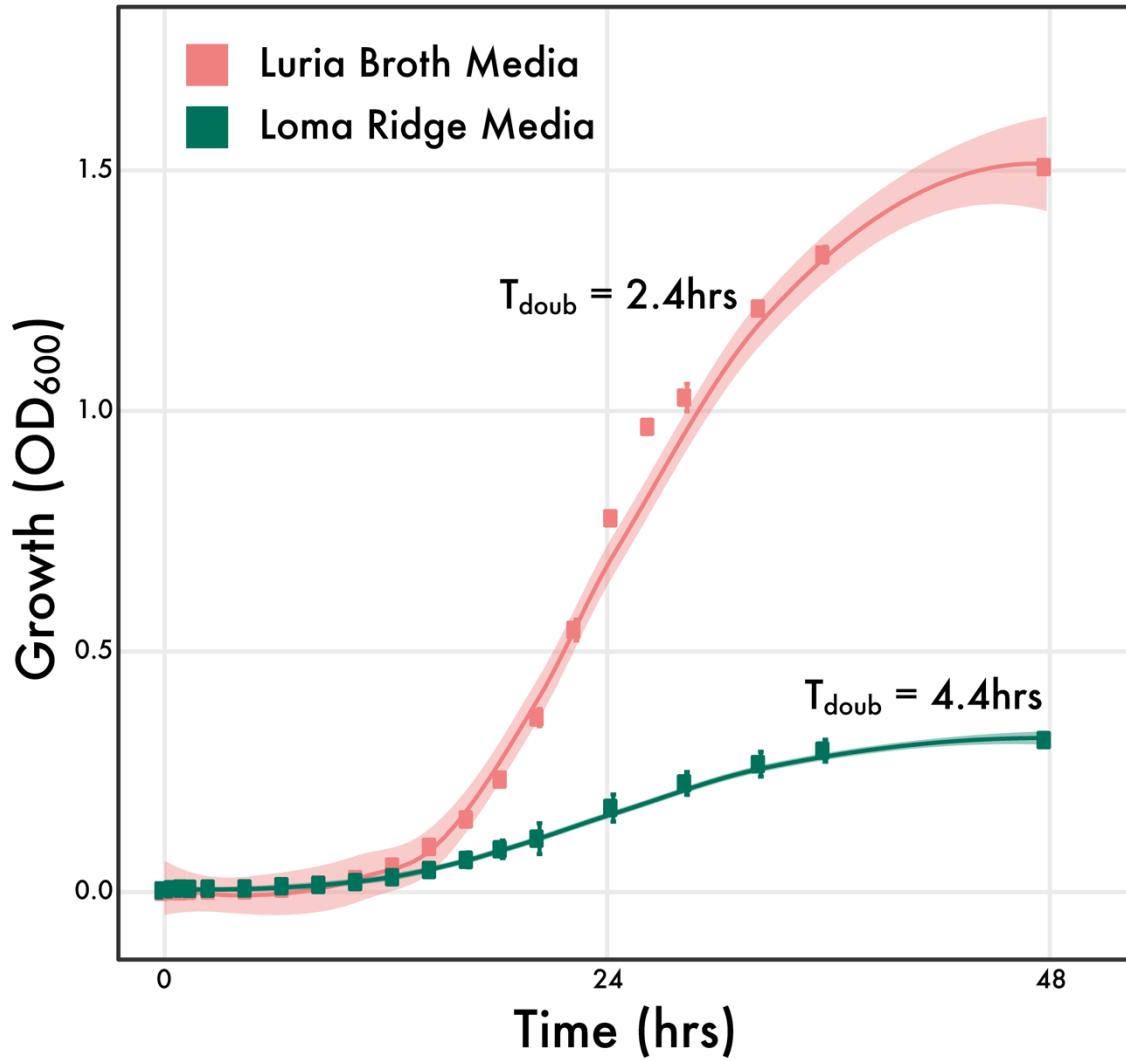

**Fig. S7.** Growth curves of the ancestral strain MMLR14002 across time (hrs) in high and low nutrient media (i.e., LB and LR media, respectively). Each time point plots a point for the mean ( $\pm$  1 SD) growth. Growth curves are visualized using smoothed averages from locally weighted smoothing (LOESS) of the mean growth values. Loma Ridge (LR) media made from Grassland litter leachate.



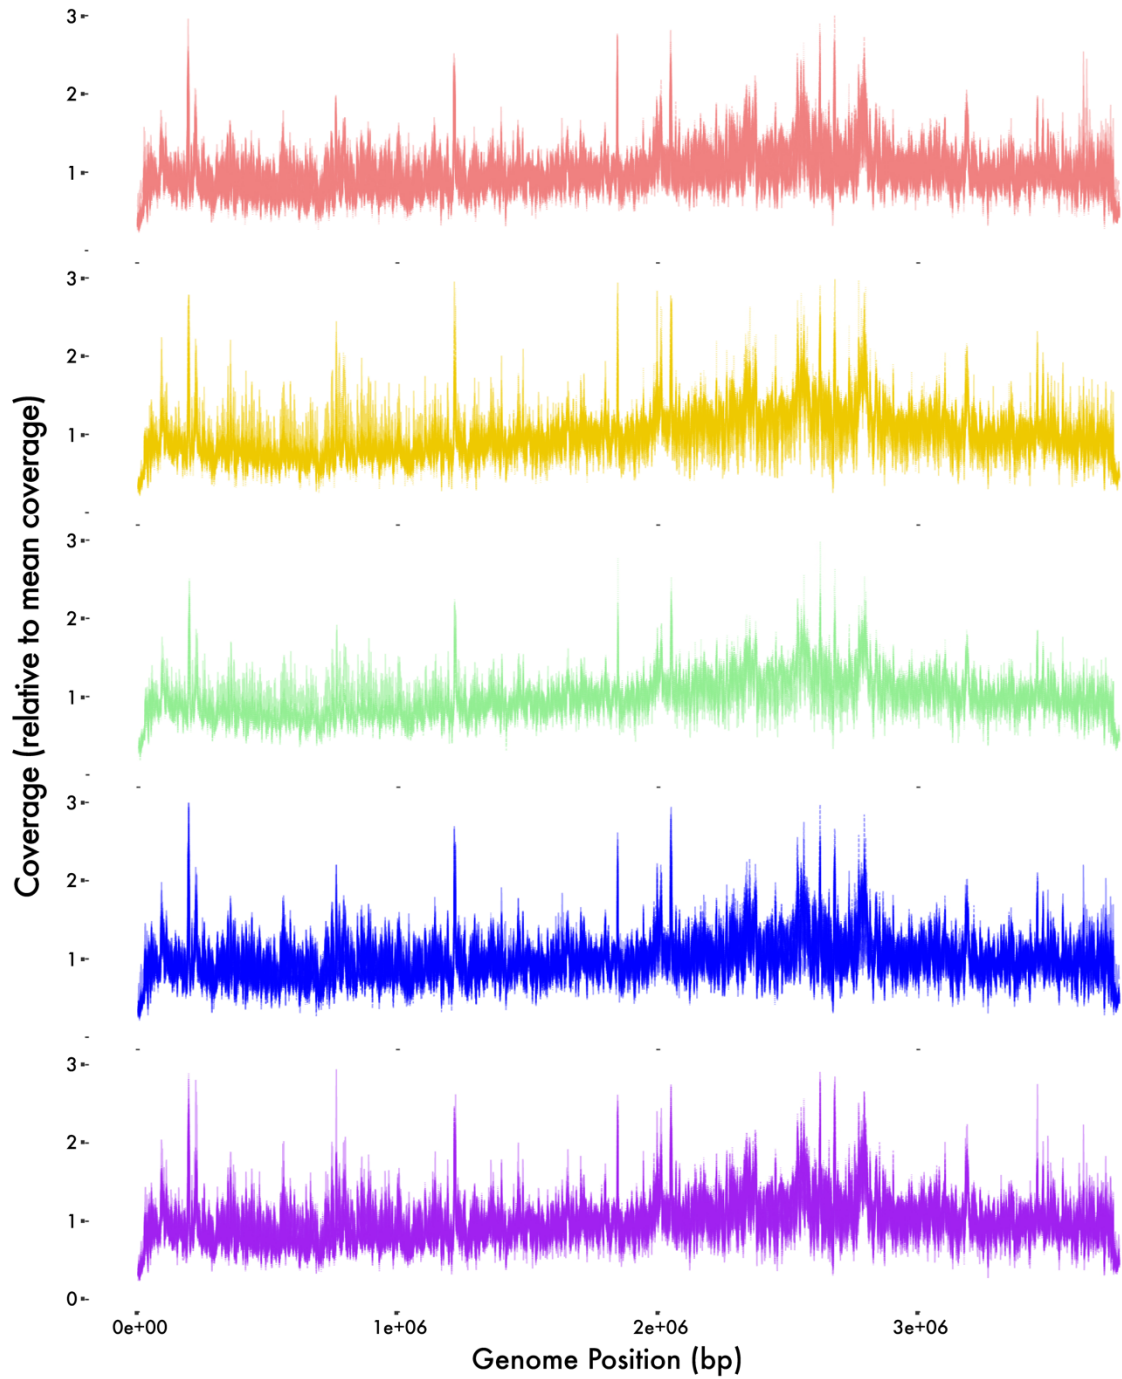

**Fig. S8.** Relative coverage of metagenomic samples to the reference genome across sites. Mean coverage for all sites is denoted as 1x.

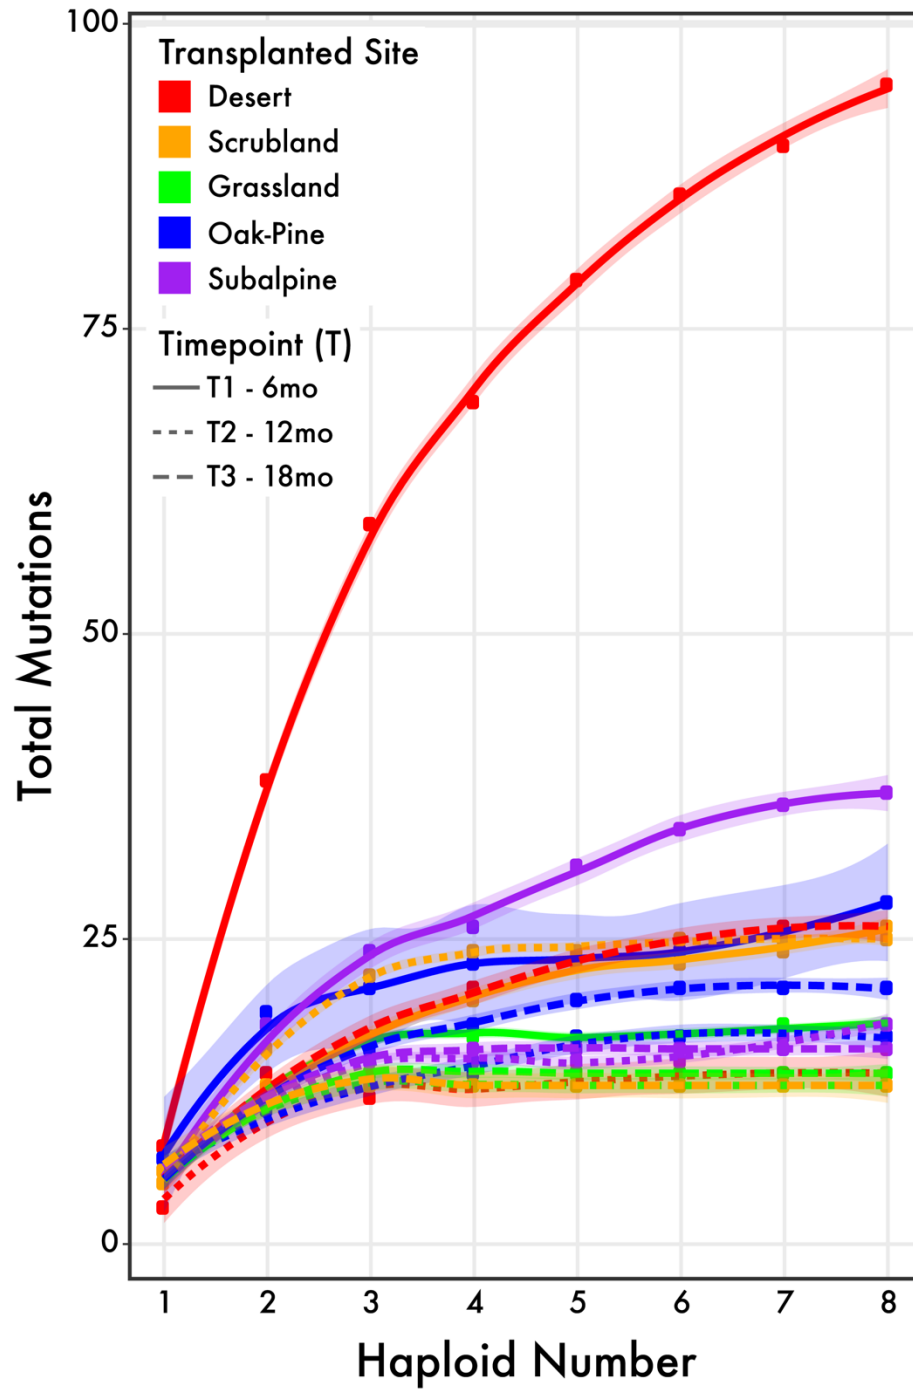

**Fig. S9.** Total number of variants called based on increasing haploid number in the GATK pipeline. Based on saturation for most samples and the expected strain heterogeneity in population samples, we selected H=3 for all variant calling.

## SI References

1. N. R. Baker, S. D. Allison, Extracellular enzyme kinetics and thermodynamics along a climate gradient in southern California. *Soil Biol. Biochem.* 114, 82–92 (2017).
